# Supplementary material for: Mesoporous carbon nanospheres with an excellent electrocapacitive performance
Source: Royal Society of Chemistry journal article supplement (doi:10.1039/c0jm03322g), 2010-12-15
Supplement: c0jm03322g.pdf [file c0jm03322g.pdf]

## **Electronic Supplementary Information**

### **Mesoporous carbon nanospheres with an excellent electrocapacitive performance**

Zhibin Lei, Nikolay Christov, Li Li Zhang, X. S. Zhao\*

*Department of Chemical and Biomolecular Engineering, National University of Singapore, 4 Engineering Drive 4, 117576, Singapore.*

\*Corresponding Authors:

Prof./Dr. X. S. Zhao, Department of Chemical and Biomolecular Engineering, National University of Singapore, 4 Engineering Drive 4, 117576, Singapore.

Tel: +65-65164727; Fax: +65-67791936; E-mail: [chezxs@nus.edu.sg](mailto:chezxs@nus.edu.sg)

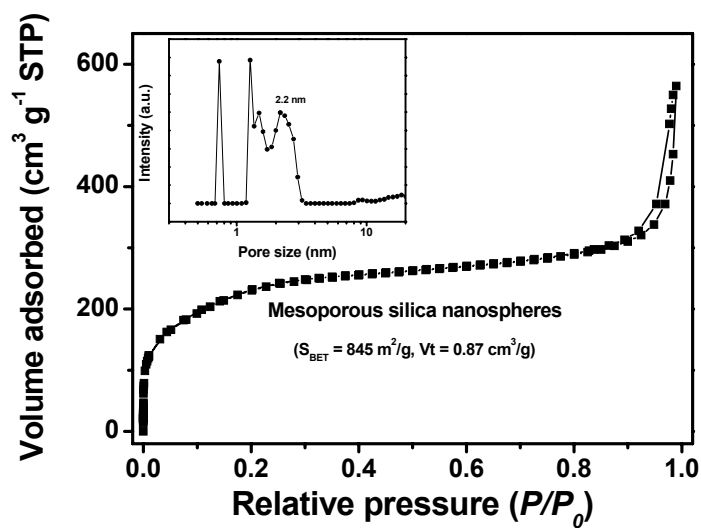

**Figure S1.**  $\text{N}_2$  adsorption isotherms and the corresponding NLDFT pore size distribution curve (inset) of the mesoporous silica nanospheres (MSS) used as template in this work.

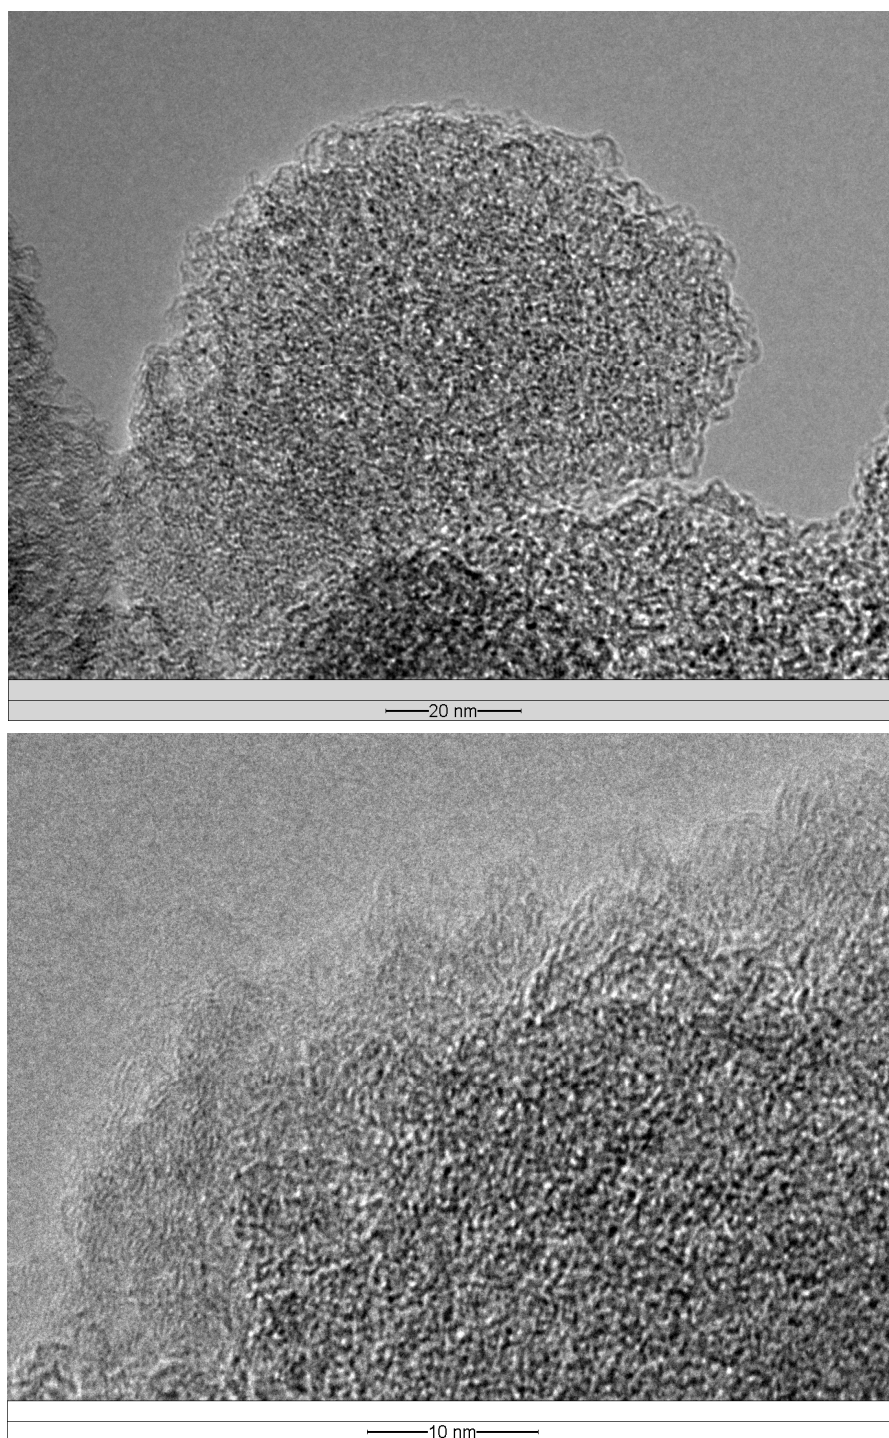

**Figure S2.** HRTEM images of MCS with different magnifications.

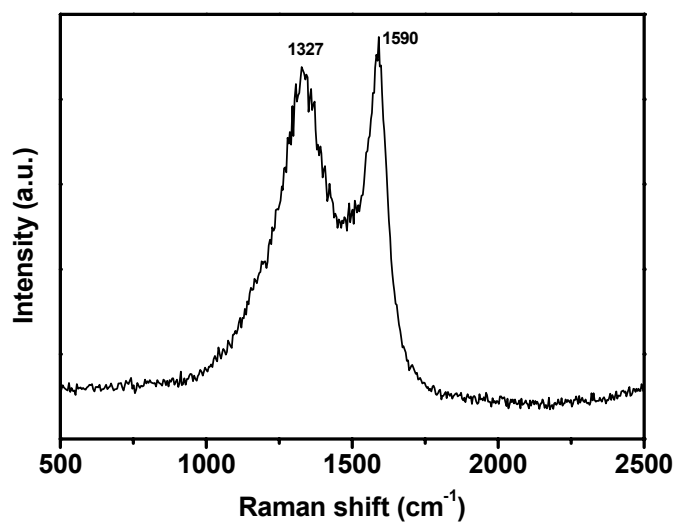

**Figure S3.** Raman spectrum of mesoporous carbon nanospheres (MCS).

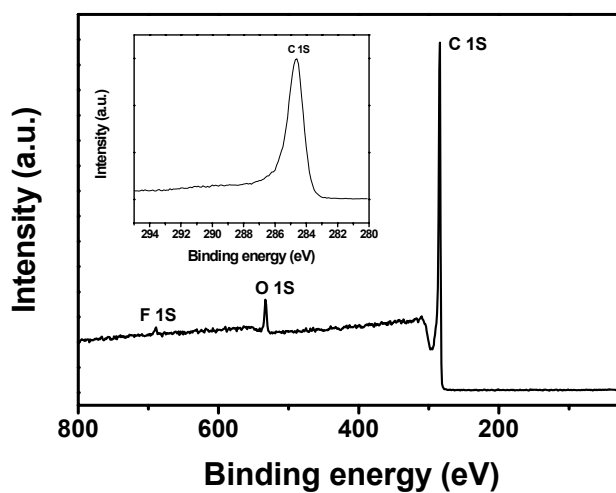

**Figure S4.** XPS spectrum of MCS. Inset shown the C 1S signal.

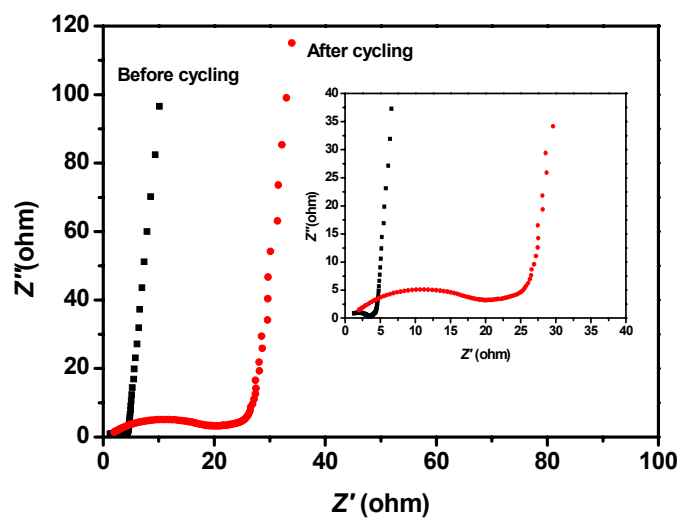

**Figure S5.** Nyquist plot of the MCS supercapacitor before and after 700 cycles in 1.5 mol/L TEABF<sub>4</sub> in acetonitrile.
